# Supplementary material for: Interfacial Stabilities, Electronic Properties and Interfacial Fracture Mechanism of 6H-SiC Reinforced Copper Matrix studied by the First Principles Method
Source: Preprints.org preprint supplement (doi:10.20944/preprints202112.0359.v1), 2021-12-22
Supplement: Supplementary file 1 [file supplementary]

**Supplementary Information**

Interfacial Stabilities, Electronic Properties and Interfacial Fracture Mechanism of 6H-SiC Reinforced Copper Matrix studied by the First Principles Method


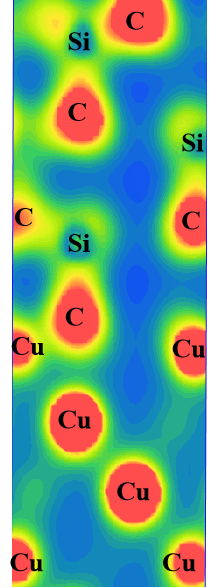

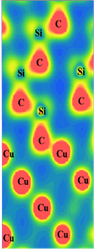

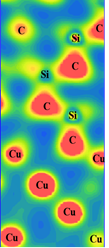

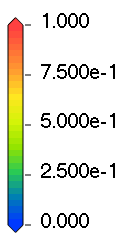


**(a)** CT-HCP(b) **(b)** CT-MT(b) **(c)** CT-OT(b)


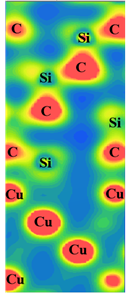

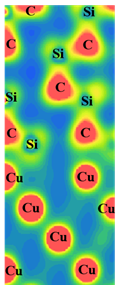

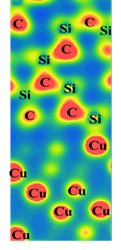

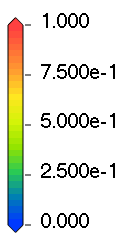


**(d)** CT-HCP(b) **(e)** CT-MT(b) **(f)** CT-OT(b)

**FIG. SI(1).** The charge density distribution of the interfacial atoms of all “(b)” type of 6H-SiC(0001)/Cu(111) interfacial models along (211) interfaces (eV/Å3)


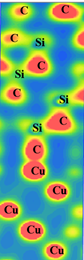

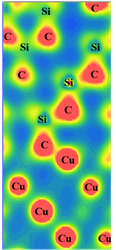

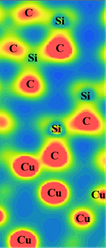

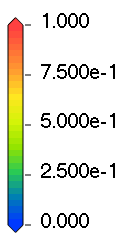


**(a)** CT-HCP(c) **(b)** CT-MT(c) **(c)** CT-OT(c)


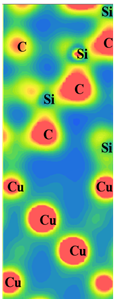

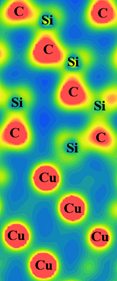

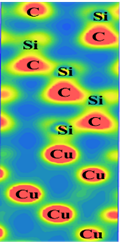

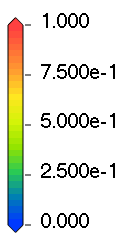


**(d)** CT-HCP(c) **(e)** CT-MT(c) **(f)** CT-OT(c)

**FIG. SI(2).** The charge density distribution of the interfacial atoms of all “(c)” type of 6H-SiC(0001)/Cu(111) interfacial models along (211) interfaces (eV/Å3)


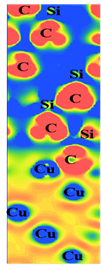

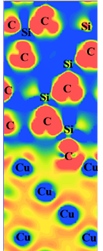

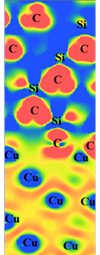

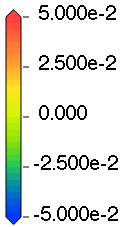


**(a)** CT-HCP(b) **(b)** CT-MT(b) **(c)** CT-OT(b)


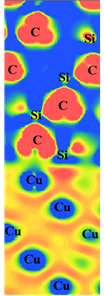

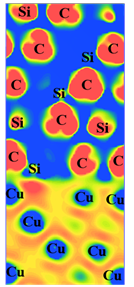

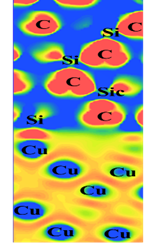

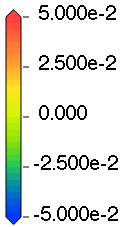


**(d)** CT-HCP(b)  **(e)** CT-MT(b)  **(f)** CT-OT(b)

**FIG. SI(3).** The charge density difference of the interfacial atoms of all “(b)” type of 6H-SiC(0001)/Cu(111) interfacial models along (211) interface (eV/Å3).


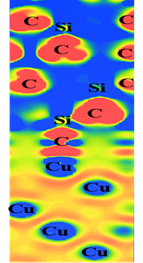

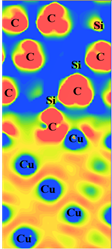

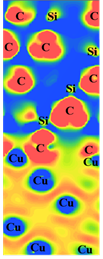

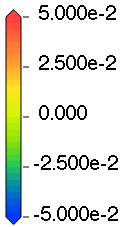


**(a)** CT-HCP(c)  **(b)** CT-MT(c) **(c)** CT-OT(c)


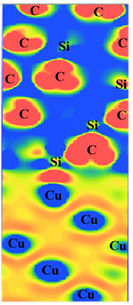

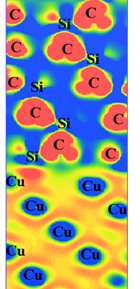

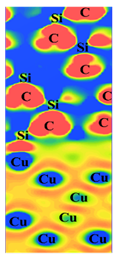

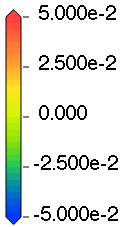


**(d)** CT-HCP(c) **(e)** CT-MT(c) **(f)** CT-OT(c)

**FIG. SI(4).** The charge density difference of the interfacial atoms of all “(c)” type of 6H-SiC(0001)/Cu(111) interfacial models along (211) interface (eV/Å3).


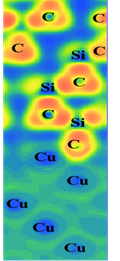

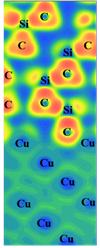

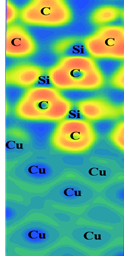

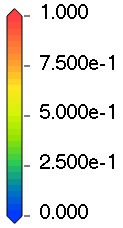


**(a)** CT-HCP(b) **(b)** CT-MT(b) **(c)** CT-OT(b)


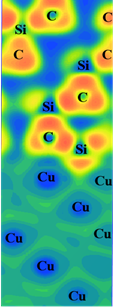

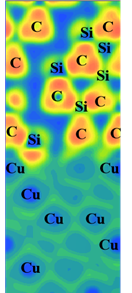

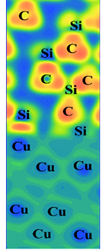

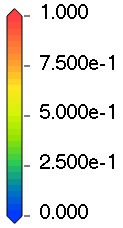


**(d)** CT-HCP(b) **(e)** CT-MT(b) **(f)** CT-OT(b)

**FIG. SI(5).** The electron localization function of the interfacial atoms of all “(b)” type of 6H-SiC(0001)/Cu(111) interfacial models along (211) interface (eV/Å3).


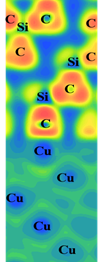

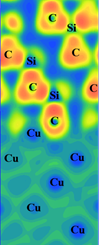

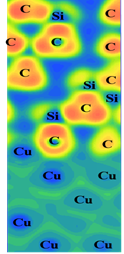

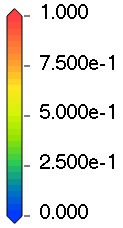


**(a)** CT-HCP(c) **(b)** CT-MT(c) **(c)** CT-OT(c)


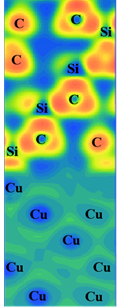

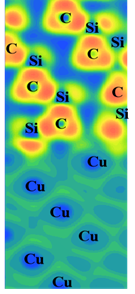

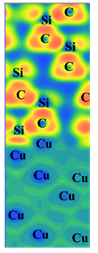

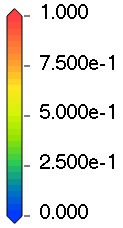


**(d)** CT-HCP(c) **(e)** CT-MT(c)  **(f)** CT-OT(c)

**FIG. SI(6).** The electron localization function of the interfacial atoms of all “(c)” type of 6H-SiC(0001)/Cu(111) interfacial models along (211) interface (eV/Å3).







**(a)**CT-HCP(b) **(b)**CT-MT(b)







**(c)**CT-OT(b) **(d)**ST-HCP(b)







**(e)**ST-MT(b) **(f)**ST-OT(b)

**FIG. SI(7).** The partial density of state of the interfacial atoms of all “(b)” type of 6H-SiC(0001)/Cu(111) interfacial models.







**(a)**CT-HCP(C) **(b)**CT-MT(c)







**(c)** CT-OT(c) **(d)**ST-HCP(c)







**(e)**ST-MT(c) **(f)**ST-OT(c)

**FIG. SI(8).** The partial density of state of the interfacial atoms of all “(c)” type of 6H-SiC(0001)/Cu(111) interfacial models.
